# Supplementary material for: A New Species in Pseudophialophora From Wild Rice and Beneficial Potential
Source: Frontiers journal article supplement (doi:10.3389/fmicb.2022.845104), 2022-03-11
Supplement: Data_Sheet_1.docx [file Data_Sheet_1.docx]

| **Table S1** Primers used in this study | |
| --- | --- |
| **Primer name** | **Primer sequences (5’-3’)** |
| ITS-F | TCCGTAGGTGAACCTGCGG |
| ITS-R | TCCTCCGCTTATTGATATGC |
| LSU-F | GTACCCGCTGAACTTAAGC |
| LSU-R | TCCTGAGGGAAACTTCG |
| RPB1-F | GARTGYCCDGGDCAYTTYGG |
| RPB1-R | CCNGCDATNTCRTTRTCCATRTA |
| SSU-F | GTAGTCATATGCTTGTCTC |
| SSU-R | CTTCCGTCAATTCCTTTAAG |
| MCM7-F | CAGGACTGCAAGGACAAC |
| MCM7-R | GGATCTTCATGCCGTCAC |
| TEF1-F | GCYCCYGGHCAYCGTGAYTT |
| TEF1-R | ATGACACCRACRGCRACRGTYTGYAT |
| *Actin-F* | GAGCTACGAGCTTCCTGATGGA |
| Actin-R | CCTCAGGGCAGCGGAAA |
| *OsActin-*F | GAGTATGATGAGTCGGGTCCAG |
| *OsActin-*R | ACACCAACAATCCCAAACAGAG |
| *OsPTR9*-F | TCTCGGGCGTACAGGTTT |
| *OsPTR9*-R | GGAGGTCGGATGGACTTATT |
| *OsAMT3;2-*F | TGTACTTCCAGTGCGTGTTC |
| *OsAMT3;2-*R | ACGGTGTAGGAGAAGGTGAG |
| *OsMRS2-8-*F | GGCAAAGTTCAAAAGGTCAGG |
| *OsMRS2-8-*R | TCTCCGTTAGGTGCAATGC |
| *OsPT4*-F | CTAGTGTACCAAACAAAATTACA |
| *OsPT4*-R | TGGCATTTATAATATCAACAGTAAC |
| *OsHAK16-*F | TGTGCTAAACCCTTCAGTCTC |
| *OsHAK16-*R | CAATCTTGTCAGTGCCAAACC |
| *OsIRO2-*F | GGCATGGCTCCCATCGT |
| *OsIRO2-*R | AACAAGCTGACCTGAACCATGA |
| *OsYSL15-*F | CAATGTGCCAGGGAGCTATAA |
| *OsYSL15-*R | TACGACCAAAGCCTTTCTTAGG |
| *NAC-*F | CGTCATCCCCGTCTTCG |
| *NAC-*R | GGCTGAACTCGCTCCTCA |
| *AOS-*F | ACCGTCGTCCGCATCAAC |
| *AOS-*R | TGCCATAGGAGCCACAGG |
| *OsSAUR2-*F | TCTCATTACCGAAGCACACC |
| *OsSAUR2-*R | CGGCCTTCATCTCAGCTAC |
| *OsWRKY71-*F | AGATGGCGATGACGCTGAC |
| *OsWRKY71-*R | AGCAATCGTCAATCCTTGGT |
| *POX1-*F | TCGCTTCGGTTGCTCTGC |
| *POX1-*R | TTGATGGCGTCGATCACG |
| *POX2-*F | TTCGGTCACGAGGAGTTCA |
| *POX2-*R | AAGGATGGAGGCATCACAA |
| *OsEL5-*F | TCGGCTCCCACTCCACCTG |
| *OsEL5-*R | TCGGGGATCTCGATCACCAG |
| *ERF4-*F | CAGGTACGCGGCGGAGATC |
| *ERF4-*R | GGGGTCGAGGAACAGGAACG |
| *OsPR1α-*F | GTATGCTATGCTACGTGTTTATGC |
| *OsPR1α-*R | GCAAATACGGCTGACAGTACAG |
| *OsPR1b-*F | ACGCCTTCACGGTCCATAC |
| *OsPR1b-*R | AAACAGAAAGAAACAGAGGGAGTAC |
